# Supplementary material for: Topology of molecular interaction networks
Source: Springer Nature journal article supplement (doi:10.1186/1752-0509-7-90), 2013-01-01

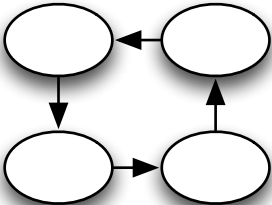

Supplement: 12918_2013_1186_MOESM4_ESM.pdf [file 12918_2013_1186_MOESM4_ESM.pdf]
